# Supplementary material
Source: Elsevier journal article supplement (https://www.sciencedirect.com/science/article/pii/S0014256516000059)
Supplement: mmc1 [file S0014256516000059:mmc1.pdf]

Anexo. Formulario de la encuesta RECALMIN

|                                                                                 |                                                                       | Definiciones y observaciones                                                                                                                                                                                                                                                                                                                                                                                                                                                          | Opciones de respuesta                                              |
|---------------------------------------------------------------------------------|-----------------------------------------------------------------------|---------------------------------------------------------------------------------------------------------------------------------------------------------------------------------------------------------------------------------------------------------------------------------------------------------------------------------------------------------------------------------------------------------------------------------------------------------------------------------------|--------------------------------------------------------------------|
| 0. Hospital                                                                     | 0.1. Comunidad Autónoma                                               | A: Andalucía; AR: Aragón; AS: Asturias; IB: Islas Baleares; CA: Canarias; CAN: Cantabria; C-LM: Castilla-La Mancha, CyL: Castilla y León; CAT: Cataluña; EX: Extremadura; GA: Galicia; LR: La Rioja; CAM: Comunidad de Madrid; MU: Murcia; NA: Navarra; PV: País Vasco; CV: Comunidad Valenciana.                                                                                                                                                                                     | A cumplimentar por Fundación Instituto Mejora Asistencia Sanitaria |
|                                                                                 | 0.2. Código del Hospital                                              | Código del Catálogo Nacional de Hospitales (CNH) (www.msc.es/ciudadanos/centros.do).                                                                                                                                                                                                                                                                                                                                                                                                  |                                                                    |
|                                                                                 | 0.3. Nombre del Hospital                                              | Nombre que figura en el CNH.                                                                                                                                                                                                                                                                                                                                                                                                                                                          |                                                                    |
|                                                                                 | 0.4. Camas Instaladas                                                 | Información proporcionada por el CNH.                                                                                                                                                                                                                                                                                                                                                                                                                                                 |                                                                    |
|                                                                                 | 0.5. Cluster Hospital                                                 | Clasificación del Ministerio de Sanidad, Servicios Sociales e Igualdad.                                                                                                                                                                                                                                                                                                                                                                                                               |                                                                    |
|                                                                                 | 0.6. Universitario                                                    |                                                                                                                                                                                                                                                                                                                                                                                                                                                                                       |                                                                    |
|                                                                                 | 0.7. Tipología Unidad                                                 | Tipo 1: ≤ 200; Tipo 2: 200 - <500; Tipo 3: 500 - <1.000; y Tipo 4: > 1.000 camas                                                                                                                                                                                                                                                                                                                                                                                                      |                                                                    |
|                                                                                 | 0.8 ¿Hay otro Servicio de Medicina Interna (MI) en el mismo Hospital? | Conteste sí, en el caso de que exista otro Servicio de MI independiente del que contesta la encuesta, con una estructura de gestión (Jefe de servicio) propia                                                                                                                                                                                                                                                                                                                         | Sí / No                                                            |
|                                                                                 |                                                                       | 0.8.1. Si hay más de un Servicio de MI, indiquenos, por favor, el número total incluyendo el suyo                                                                                                                                                                                                                                                                                                                                                                                     | Nº total de Servicios de MI existentes en el Hospital              |
| 1. Caracterización de la unidad                                                 | 1.1. Nombre del responsable de la Unidad                              |                                                                                                                                                                                                                                                                                                                                                                                                                                                                                       | Nombre y dos apellidos                                             |
|                                                                                 | 1.2. Correo electrónico de contacto                                   |                                                                                                                                                                                                                                                                                                                                                                                                                                                                                       | Dirección de correo electrónico                                    |
|                                                                                 | 1.3. Denominación institucional del servicio o unidad                 | Indique, por favor, la opción que mejor se ajuste a su situación.                                                                                                                                                                                                                                                                                                                                                                                                                     | Instituto o Área de Gestión Clínica Servicio                       |
|                                                                                 | 1.4. Población del ámbito de influencia del Servicio/Unidad de MI     | Se refiere al número de habitantes adscritos al área de influencia directa del hospital                                                                                                                                                                                                                                                                                                                                                                                               | Nº de habitantes.                                                  |
|                                                                                 | 1.5. Especialidades médicas integradas en el Servicio de MI:          | Implica dependencia jerárquica y funcional del Servicio de MI.                                                                                                                                                                                                                                                                                                                                                                                                                        |                                                                    |
|                                                                                 | 1.5.1. Alergología                                                    | Si sí especifique número de alergólogos                                                                                                                                                                                                                                                                                                                                                                                                                                               | Nº de alergólogos / No                                             |
|                                                                                 | 1.5.2. Cardiología                                                    | Si sí especifique número de cardiólogos                                                                                                                                                                                                                                                                                                                                                                                                                                               | Nº de cardiólogos / No                                             |
|                                                                                 | 1.5.3. Dermatología                                                   | Si sí especifique número de dermatólogos                                                                                                                                                                                                                                                                                                                                                                                                                                              | Nº de dermatólogos / No                                            |
|                                                                                 | 1.5.4. Aparato Digestivo                                              | Si sí especifique número de especialistas en a. digestivo                                                                                                                                                                                                                                                                                                                                                                                                                             | Nº de especialistas en a. digestivo / No                           |
|                                                                                 | 1.5.5. Endocrinología                                                 | Si sí especifique número de endocrinólogos                                                                                                                                                                                                                                                                                                                                                                                                                                            | Nº de endocrinólogos / No                                          |
|                                                                                 | 1.5.6. Geriátría                                                      | Si sí especifique número de geriatras                                                                                                                                                                                                                                                                                                                                                                                                                                                 | Nº de geriatras / No                                               |
|                                                                                 | 1.5.7. Hematología                                                    | Si sí especifique el número de hematólogos                                                                                                                                                                                                                                                                                                                                                                                                                                            | Nº de hematólogos / No                                             |
|                                                                                 | 1.5.8. Internistas                                                    | Nº de internistas (incluyendo el Jefe de Servicio)                                                                                                                                                                                                                                                                                                                                                                                                                                    | Nº de internistas                                                  |
|                                                                                 | 1.5.9. Nefrología                                                     | Si sí especifique número de nefrólogos                                                                                                                                                                                                                                                                                                                                                                                                                                                | Nº de nefrólogos / No                                              |
|                                                                                 | 1.5.10. Neumología                                                    | Si sí especifique número de neumólogos                                                                                                                                                                                                                                                                                                                                                                                                                                                | Nº de neumólogos / No                                              |
|                                                                                 | 1.5.11. Neurología                                                    | Si sí especifique número de neurólogos                                                                                                                                                                                                                                                                                                                                                                                                                                                | Nº de neurólogos / No                                              |
|                                                                                 | 1.5.12. Medicina interna                                              | Si sí especifique número de oncólogos médicos                                                                                                                                                                                                                                                                                                                                                                                                                                         | Nº de oncólogos médicos / No                                       |
|                                                                                 | 1.5.13. Reumatología                                                  | Si sí especifique número de reumatólogos                                                                                                                                                                                                                                                                                                                                                                                                                                              | Nº de reumatólogos / No                                            |
|                                                                                 | 1.6. Número total de médicos adscritos al servicio                    | Todos los médicos del Servicio o Unidad (incluye los médicos especialistas relacionados en 1.3.). Incluya, en su caso, a eventuales e interinos que estén desempeñando su actividad en el servicio / unidad. No incluya residentes, asistentes voluntarios, becarios, etc. Utilice, en caso necesario, equivalentes a tiempo completo (ETC). Si por ejemplo, una plantilla de 12 médicos ha tenido un refuerzo de 1 médico durante 6 meses se calculará como 12 + 0,5 = 12,5 médicos. | Nº de médicos en el Servicio / Unidad                              |
|                                                                                 | 1.7. ¿Depende el Servicio de Urgencias del hospital de MI?            |                                                                                                                                                                                                                                                                                                                                                                                                                                                                                       | Sí / No                                                            |
| 1.7.1. Si 1.6. es sí: Nº de médicos (en ETC) adscritos al Servicio de Urgencias |                                                                       | Nº de médicos del Servicio de MI adscritos al Servicio de Urgencias                                                                                                                                                                                                                                                                                                                                                                                                                   |                                                                    |

|                                                                                                                     | Definiciones y observaciones                                                                                                | Opciones de respuesta                                                                                                                                                                                                                                                                                                                                                                                                                                                                                                                                                                                                                         |                                                                                                      |
|---------------------------------------------------------------------------------------------------------------------|-----------------------------------------------------------------------------------------------------------------------------|-----------------------------------------------------------------------------------------------------------------------------------------------------------------------------------------------------------------------------------------------------------------------------------------------------------------------------------------------------------------------------------------------------------------------------------------------------------------------------------------------------------------------------------------------------------------------------------------------------------------------------------------------|------------------------------------------------------------------------------------------------------|
| <b>2. Recursos asignados al Servicio / Unidad de Medicina Interna</b>                                               | 2.1. ¿El Hospital tiene una Unidad de Corta Estancia no dependiente del Servicio / Unidad de MI?                            | Sí / No                                                                                                                                                                                                                                                                                                                                                                                                                                                                                                                                                                                                                                       |                                                                                                      |
|                                                                                                                     | 2.2. ¿El Hospital tiene un hospital de media estancia asignado?                                                             | Sí / No                                                                                                                                                                                                                                                                                                                                                                                                                                                                                                                                                                                                                                       |                                                                                                      |
|                                                                                                                     | 2.3. Nº de locales de consulta asignados a MI                                                                               | Estimar el número de locales como "equivalentes a tiempo completo". Si, por ejemplo, el Servicio/Unidad de MI tiene asignados 2 locales de consulta todos los días de la semana y uno más los lunes, miércoles y viernes se consignará 2,6 (2+(3/5)). No incluir locales de consulta que estén dedicados a especialidades integradas en el Servicio o Unidad                                                                                                                                                                                                                                                                                  | Nº de locales de consulta de MI                                                                      |
|                                                                                                                     | 2.3.1. Consulta monográfica de VIH?                                                                                         | Contestar sí si el servicio/unidad de MI ha desarrollado una de estas consultas monográficas, manteniendo su actividad con regularidad                                                                                                                                                                                                                                                                                                                                                                                                                                                                                                        | Sí / No                                                                                              |
|                                                                                                                     | 2.3.2. Consulta monográfica de Infecciosas?                                                                                 |                                                                                                                                                                                                                                                                                                                                                                                                                                                                                                                                                                                                                                               | Sí / No                                                                                              |
|                                                                                                                     | 2.3.3. Consulta monográfica de riesgo cardiovascular?                                                                       |                                                                                                                                                                                                                                                                                                                                                                                                                                                                                                                                                                                                                                               | Sí / No                                                                                              |
|                                                                                                                     | 2.3.4. Consulta monográfica de diagnóstico rápido?                                                                          |                                                                                                                                                                                                                                                                                                                                                                                                                                                                                                                                                                                                                                               | Sí / No                                                                                              |
|                                                                                                                     | 2.3.5. Consulta monográfica de pluripatología?                                                                              |                                                                                                                                                                                                                                                                                                                                                                                                                                                                                                                                                                                                                                               | Sí / No                                                                                              |
|                                                                                                                     | 2.3.6. Consulta monográfica de genética?                                                                                    |                                                                                                                                                                                                                                                                                                                                                                                                                                                                                                                                                                                                                                               | Sí / No                                                                                              |
|                                                                                                                     | 2.3.7. Consulta monográfica de enfermedad tromboembólica?                                                                   |                                                                                                                                                                                                                                                                                                                                                                                                                                                                                                                                                                                                                                               | Sí / No                                                                                              |
|                                                                                                                     | 2.3.8. Consulta monográfica de colagenosis/inmunología?                                                                     |                                                                                                                                                                                                                                                                                                                                                                                                                                                                                                                                                                                                                                               | Sí / No                                                                                              |
|                                                                                                                     | 2.3.9. Consulta monográfica de insuficiencia cardíaca?                                                                      |                                                                                                                                                                                                                                                                                                                                                                                                                                                                                                                                                                                                                                               | Sí / No                                                                                              |
|                                                                                                                     | 2.3.10. Otras (especificar)                                                                                                 |                                                                                                                                                                                                                                                                                                                                                                                                                                                                                                                                                                                                                                               | Especificar                                                                                          |
|                                                                                                                     | 2.4. ¿Cuenta el Hospital con un Hospital de día (HdD) médico?                                                               | Sí / No                                                                                                                                                                                                                                                                                                                                                                                                                                                                                                                                                                                                                                       |                                                                                                      |
|                                                                                                                     | 2.5. ¿Ha desarrollado el Servicio / Unidad un programa de atención a pacientes crónicos complejos ?                         | Se considera que ha desarrollado un programa de atención a pacientes crónicos complejos/pluripatológicos si cumple con los siguientes requisitos:<br>1. La vinculación entre el/los médicos de la unidad y los médicos del nivel de atención primaria para la atención sistemática a los pacientes pluripatológicos / crónicos complejos.<br>2. La disponibilidad, por parte del Servicio, de un amplio abanico de modalidades asistenciales que permitan garantizar la atención a los pacientes crónicos complejos o pluripatológicos en el momento y lugar más adecuado. Unidad de pacientes Pluripatológicos. Estándares y Recomendaciones | Sí / No                                                                                              |
|                                                                                                                     | 2.5.1. Si 2.5. es Sí. Nº de habitantes comprendidos en el ámbito de influencia del programa de pacientes crónicos complejos | Estimación de la población cubierta por el programa de pacientes crónicos complejos. Por ejemplo: si el servicio, ha desarrollado el programa con dos médicos de un equipo de atención primaria que tienen una población asignada de 2.500 ciudadanos; con otros tres médicos de otro equipo que tienen, cada uno 2.000 ciudadanos asignados y con otro médico de atención primaria que tiene asignados 1.750, el nº de habitantes comprendidos en el ámbito de influencia del programa será:<br>$(2 \times 2.500) + (3 \times 2.000) + 1.750 = 12.750$ habitantes.                                                                           | Nº de habitantes en el ámbito de influencia del programa de atención a pacientes crónicos complejos. |
|                                                                                                                     | 2.5.2. Nº de camas de hospitalización convencional asignadas al programa de pacientes crónicos complejos                    | Si no tiene camas específicamente dedicadas a pacientes crónicos complejos: 0                                                                                                                                                                                                                                                                                                                                                                                                                                                                                                                                                                 | Nº de camas dedicadas al programa de pacientes crónicos complejos                                    |
|                                                                                                                     | 2.5.3. Nº de puestos de HdD dedicados a pacientes crónico complejos                                                         | Si no tiene puestos de HdD específicamente dedicados al programa de pacientes crónicos complejos, ponga: 0                                                                                                                                                                                                                                                                                                                                                                                                                                                                                                                                    | Nº de puestos de HdD dedicados al programa de pacientes crónicos complejos                           |
|                                                                                                                     | 2.5.4. Nº de locales de consulta dedicados al programa de pacientes crónicos complejos                                      | Si no tiene locales de consulta específicamente dedicados al programa de pacientes crónicos complejos, ponga: 0                                                                                                                                                                                                                                                                                                                                                                                                                                                                                                                               | Nº de locales de consulta dedicados al programa de pacientes crónicos complejos                      |
| 2.6. Relación con atención primaria. Tenga o no desarrollado un programa de atención a pacientes crónicos complejos |                                                                                                                             | Sí / No                                                                                                                                                                                                                                                                                                                                                                                                                                                                                                                                                                                                                                       |                                                                                                      |

|                                                                                                                                | Definiciones y observaciones                                                                                                                                                                                                                                                                                                                                                                                                                                                | Opciones de respuesta                                                      |
|--------------------------------------------------------------------------------------------------------------------------------|-----------------------------------------------------------------------------------------------------------------------------------------------------------------------------------------------------------------------------------------------------------------------------------------------------------------------------------------------------------------------------------------------------------------------------------------------------------------------------|----------------------------------------------------------------------------|
| / pacientes pluripatológicos, ¿Tiene algún método de relación con atención primaria distinto del parte interconsulta?          |                                                                                                                                                                                                                                                                                                                                                                                                                                                                             |                                                                            |
| 2.6.1. Correo electrónico                                                                                                      |                                                                                                                                                                                                                                                                                                                                                                                                                                                                             | Sí / No                                                                    |
| 2.6.2. Teléfono móvil                                                                                                          |                                                                                                                                                                                                                                                                                                                                                                                                                                                                             | Sí / No                                                                    |
| 2.6.3. Desplazamiento al centro de salud                                                                                       |                                                                                                                                                                                                                                                                                                                                                                                                                                                                             | Sí / No                                                                    |
| 2.6.4. Videoconferencia                                                                                                        |                                                                                                                                                                                                                                                                                                                                                                                                                                                                             | Sí / No                                                                    |
| 2.7. ¿Ha desarrollado el Servicio/Unidad de MI una Unidad de Interconsulta a otros servicios hospitalarios?                    | Implica la asignación continuada de uno o más médicos internistas a esta función                                                                                                                                                                                                                                                                                                                                                                                            | Sí / No                                                                    |
| 2.7.1. Si 2.7. es Sí. Nº de médicos asignados a la "unidad de interconsulta" en equivalentes a tiempo completo                 | Estimar el número de médicos en "equivalentes a tiempo completo"                                                                                                                                                                                                                                                                                                                                                                                                            | Nº de médicos asignados a la unidad de interconsulta                       |
| 2.8. Unidad hospitalaria de cuidados paliativos (UCP) de agudos en el Hospital                                                 | Organización de profesionales sanitarios, que ofrece atención multidisciplinaria de cuidados paliativos mediante diferentes modalidades de asistencia que incluyen necesariamente la hospitalización en camas específicas, y que cumple unos requisitos funcionales, estructurales y organizativos, que garantizan las condiciones adecuadas de calidad, seguridad y eficiencia, para realizar esta actividad (Unidad de Cuidados Paliativos. Estándares y Recomendaciones) | Sí / No                                                                    |
| 2.8.1. ¿La UCP está asignada a MI?                                                                                             |                                                                                                                                                                                                                                                                                                                                                                                                                                                                             | Sí / No                                                                    |
| 2.8.2. Nº de camas en la UCP (sólo si 2.8.1. es sí)                                                                            |                                                                                                                                                                                                                                                                                                                                                                                                                                                                             | Nº de camas en UCP                                                         |
| 2.9. Hospitalización a Domicilio en el Hospital                                                                                | Hospitalización a domicilio<br>Modalidad asistencial capaz de realizar en el domicilio procedimientos diagnósticos, terapéuticos y cuidados similares a los dispensados en el hospital y por un plazo limitado de tiempo. (Unidad de Pacientes Pluripatológicos. Estándares y Recomendaciones)                                                                                                                                                                              | Sí / No                                                                    |
| 2.9.1. ¿La Hospitalización a Domicilio está asignada a MI?                                                                     |                                                                                                                                                                                                                                                                                                                                                                                                                                                                             | Sí / No                                                                    |
| 2.10. Nº de puestos de guardia de presencia física de MI                                                                       | Contabilicé exclusivamente los puestos de guardia del área médica, excluyendo los de especialidad (si están de guardia de presencia física un internista y un cardiólogo y el cardiólogo atiende exclusivamente a los pacientes cardiológicos se debe contestar: 1. Si, por el contrario, el cardiólogo atiende a todos los pacientes, se contabilizará como 2. No incluir los profesionales dedicados al servicio de urgencias                                             | Nº de puestos de guardia de MI                                             |
| 2.11. Personal de enfermería                                                                                                   |                                                                                                                                                                                                                                                                                                                                                                                                                                                                             |                                                                            |
| 2.11.1. Ratio pacientes ingresados atendidos por el Servicio de Medicina Interna / enfermera en turno de mañana, día laborable | Contabilicé exclusivamente las enfermeras (Licenciadas o Diplomadas Universitarias en Enfermería) incluyendo, en su caso, supervisoras, debiéndose expresar como nº de pacientes por cada enfermera (por ejemplo 8:1)                                                                                                                                                                                                                                                       | Nº de pacientes por enfermera, turno de mañana, día laborable              |
| 2.11.2. Ratio pacientes ingresados atendidos por el Servicio de Medicina Interna / enfermera en turno de tarde, día laborable  |                                                                                                                                                                                                                                                                                                                                                                                                                                                                             | Nº de pacientes por enfermera, turno de tarde, día laborable               |
| 2.11.3. Ratio pacientes ingresados atendidos por el Servicio de Medicina Interna / enfermera en turno de noche, día laborable  |                                                                                                                                                                                                                                                                                                                                                                                                                                                                             | Nº de pacientes por enfermera, turno de noche, día laborable               |
| 2.11.4. Ratio pacientes ingresados atendidos por el Servicio de Medicina Interna / enfermera en turno de mañana, día festivo   |                                                                                                                                                                                                                                                                                                                                                                                                                                                                             | Nº de pacientes por enfermera, turno de mañana, fines de semana y festivos |
| 2.11.5. Ratio pacientes ingresados atendidos por el Servicio de Medicina Interna / enfermera en turno de tarde, día festivo    |                                                                                                                                                                                                                                                                                                                                                                                                                                                                             | Nº de pacientes por enfermera, turno de tarde, fines de semana y festivos  |

|                           |                                                                                                                                                                                                                                                                                                     | Definiciones y observaciones                                                                                                                                                                                                                                                                                                   | Opciones de respuesta                                                         |
|---------------------------|-----------------------------------------------------------------------------------------------------------------------------------------------------------------------------------------------------------------------------------------------------------------------------------------------------|--------------------------------------------------------------------------------------------------------------------------------------------------------------------------------------------------------------------------------------------------------------------------------------------------------------------------------|-------------------------------------------------------------------------------|
|                           | 2.11.6. Ratio pacientes ingresados atendidos por el Servicio de Medicina Interna / enfermera en turno de noche, día festivo                                                                                                                                                                         |                                                                                                                                                                                                                                                                                                                                | Nº de pacientes por enfermera, turno de noche, día fines de semana y festivos |
|                           | 2.11.7. Nº de enfermeras gestoras de casos / de enlace                                                                                                                                                                                                                                              | Enfermera gestora de casos / Enfermera comunitaria de enlace: enfermera con elevado conocimiento clínico y capacidad organizativa sobre el conjunto del proceso asistencial de una patología/s específica/s, que facilita la coordinación de los recursos sanitarios, sociosanitarios y sociales y la continuidad de cuidados. | Nº de enfermeras gestoras de casos                                            |
| 3. Actividad              | 3.1. Número de altas/año (hospitalización convencional)                                                                                                                                                                                                                                             |                                                                                                                                                                                                                                                                                                                                | Nº de altas en camas de hospitalización convencional                          |
|                           | 3.2. Estancia media (hospitalización convencional)                                                                                                                                                                                                                                                  |                                                                                                                                                                                                                                                                                                                                | Expresado en días y con un decimal (por ejemplo: 5,4 días)                    |
|                           | 3.3. Número de altas/año (UCP)                                                                                                                                                                                                                                                                      | Sólo para las unidades que tienen camas de UCP asignadas. Indique el dato correspondiente al ejercicio de 2013.                                                                                                                                                                                                                | Nº de altas en camas de hospitalización UCP                                   |
|                           | 3.4. Estancia media (UCP)                                                                                                                                                                                                                                                                           | Sólo para las unidades que tienen camas de UCP asignadas. Indique el dato correspondiente al ejercicio de 2013.                                                                                                                                                                                                                | Expresado en días y con un decimal (por ejemplo: 12,5 días)                   |
|                           | 3.5. Nº de pacientes en Hospitalización a Domicilio                                                                                                                                                                                                                                                 | Nº de pacientes tratados mediante la modalidad asistencial de hospitalización a domicilio en 2013                                                                                                                                                                                                                              | Nº de pacientes                                                               |
|                           | 3.6. Nº de interconsultas hospitalarias                                                                                                                                                                                                                                                             | Nº de interconsultas hospitalarias en 2013                                                                                                                                                                                                                                                                                     | Nº de interconsultas (partes)                                                 |
|                           | 3.6.1. Nº de visitas promedio hasta la resolución de la interconsulta                                                                                                                                                                                                                               |                                                                                                                                                                                                                                                                                                                                | Nº de interconsultas promedio por parte interconsulta                         |
|                           | 3.7. Consultas primeras                                                                                                                                                                                                                                                                             | Incluye las consultas de "alta resolución". Indique el dato correspondiente al ejercicio de 2013.                                                                                                                                                                                                                              | Nº de consultas primeras                                                      |
|                           | 3.8. Número de consultas sucesivas/año                                                                                                                                                                                                                                                              | Indique el dato correspondiente al ejercicio de 2013.                                                                                                                                                                                                                                                                          | Nº de consultas sucesivas                                                     |
|                           | 3.9. Consultas no presenciales                                                                                                                                                                                                                                                                      | Consultas resueltas con atención primaria mediante correo electrónico e Historia Clínica Electrónica                                                                                                                                                                                                                           | Nº de consultas no presenciales                                               |
|                           | 3.10. Número de sesiones en HdD                                                                                                                                                                                                                                                                     | Número de contactos que los pacientes de MI hayan tenido en el HdD, independientemente de los cuidados que precise para cada una de las sesiones.                                                                                                                                                                              | Nº de sesiones                                                                |
|                           | 3.11. Nº de urgencias adultos (hospital)                                                                                                                                                                                                                                                            | Número de consultas en el servicio de urgencias del hospital. Indique el dato correspondiente al ejercicio de 2013. Excluye pediátricas y obstétricas                                                                                                                                                                          | Nº de urgencias                                                               |
| 4. Sistema de Información | 4.1. ¿El hospital dispone de historia clínica electrónica (HCE)?                                                                                                                                                                                                                                    |                                                                                                                                                                                                                                                                                                                                | Sí / No                                                                       |
|                           | 4.1.1. En caso afirmativo, ¿puede compartir la historia electrónica con atención primaria?                                                                                                                                                                                                          |                                                                                                                                                                                                                                                                                                                                | Sí / No                                                                       |
|                           | 4.1.2. En caso de que se comparta la HC con atención primaria. ¿Se trata de una sólo HCE o están diferenciadas las HCE de atención primaria y atención despecializada (se pueden consultar, pero los especialistas de hospital no pueden escribir en la historia de atención primaria y viceversa)? |                                                                                                                                                                                                                                                                                                                                | Sí / No                                                                       |
| 5. Investigación          | 5.1. Nº de profesionales que, dependiendo del Servicio de MI, se dedican a investigación en equivalentes a tiempo completo                                                                                                                                                                          | Incluir todos los profesionales en Equivalentes a Tiempo Completo                                                                                                                                                                                                                                                              | Nº de investigadores a tiempo completo                                        |
|                           | 5.2. ¿Está integrada la unidad en alguna estructura organizativa estable (RETIC o CIBER) promovida por el Instituto Carlos III?                                                                                                                                                                     |                                                                                                                                                                                                                                                                                                                                | Sí / No                                                                       |
|                           | 5.3. Proyectos de investigación de convocatorias públicas competitivas nacionales o internacionales (con al menos un miembro del servicio/unidad como investigador)                                                                                                                                 | Indique el dato correspondiente al ejercicio de 2013.                                                                                                                                                                                                                                                                          | Nº de ensayos                                                                 |
|                           | 5.4. Proyectos de investigación de convocatorias privadas competitivas nacionales o internacionales, con al menos un miembro del servicio/unidad                                                                                                                                                    | Indique el dato correspondiente al ejercicio de 2013.                                                                                                                                                                                                                                                                          | Nº de ensayos                                                                 |

|                     |                                                                                                                                                                                                                                                      | Definiciones y observaciones                                                                                                                                                                                                                                                                                                                                                                                    | Opciones de respuesta   |
|---------------------|------------------------------------------------------------------------------------------------------------------------------------------------------------------------------------------------------------------------------------------------------|-----------------------------------------------------------------------------------------------------------------------------------------------------------------------------------------------------------------------------------------------------------------------------------------------------------------------------------------------------------------------------------------------------------------|-------------------------|
|                     | como investigador                                                                                                                                                                                                                                    |                                                                                                                                                                                                                                                                                                                                                                                                                 |                         |
|                     | 5.5. Ensayos clínicos en los que participa al menos un miembro del servicio / unidad                                                                                                                                                                 | Indique el dato correspondiente al ejercicio de 2013.                                                                                                                                                                                                                                                                                                                                                           | Nº de ensayos           |
|                     | 5.6. Nº de estudios no incluidos en ensayos clínicos, que hayan sido autorizados por el Comité de ética del hospital                                                                                                                                 | Indique el dato correspondiente al ejercicio de 2013.                                                                                                                                                                                                                                                                                                                                                           | Nº de otros estudios    |
|                     | 5.7. ¿En cuántas publicaciones en revistas con factor de impacto (JCR) ha participado al menos un miembro del servicio / unidad?                                                                                                                     | Indique el dato correspondiente al ejercicio de 2013.                                                                                                                                                                                                                                                                                                                                                           | Nº de publicaciones     |
|                     | 5.8. Factor de impacto total                                                                                                                                                                                                                         | Σ (sumatorio) factor de impacto de todos los trabajos publicados en 2013                                                                                                                                                                                                                                                                                                                                        | Factor de impacto total |
|                     | 5.7. ¿Algún miembro del servicio ha registrado una patente o similar, ha realizado algún acuerdo de transferencia de los resultados de la investigación o ha creado alguna empresa (spin-off) para comercializar los resultados de la investigación? |                                                                                                                                                                                                                                                                                                                                                                                                                 | Sí / No                 |
| 6. Docencia         | 6.1. ¿La unidad está acreditada para la formación MIR en MI?                                                                                                                                                                                         |                                                                                                                                                                                                                                                                                                                                                                                                                 | Sí / No                 |
|                     | 6.1.1. Nº residentes 1er año                                                                                                                                                                                                                         |                                                                                                                                                                                                                                                                                                                                                                                                                 | Nº residentes           |
|                     | 6.1.1. Nº residentes 2º año                                                                                                                                                                                                                          |                                                                                                                                                                                                                                                                                                                                                                                                                 | Nº residentes           |
|                     | 6.1.1. Nº residentes 3er año                                                                                                                                                                                                                         |                                                                                                                                                                                                                                                                                                                                                                                                                 | Nº residentes           |
|                     | 6.1.1. Nº residentes 4º año                                                                                                                                                                                                                          |                                                                                                                                                                                                                                                                                                                                                                                                                 | Nº residentes           |
|                     | 6.1.1. Nº residentes 5º año                                                                                                                                                                                                                          |                                                                                                                                                                                                                                                                                                                                                                                                                 | Nº residentes           |
| 7. Buenas prácticas | 7.1. ¿Existen reuniones multidisciplinarias del equipo asistencial?                                                                                                                                                                                  | Reuniones periódicas del equipo del Servicio/Unidad, incluyendo a la enfermería y, en su caso, trabajadores sociales, para analizar los procesos de atención, gestión de pacientes, aspectos de calidad, etc.                                                                                                                                                                                                   | Sí / No                 |
|                     | 7.2. ¿Se ha constituido y está en funcionamiento la Comisión de Seguridad del Paciente del Servicio / Unidad ?                                                                                                                                       | Reuniones periódicas del equipo del Servicio/Unidad, para analizar con un enfoque sistemático, los incidentes de seguridad que hayan ocurrido en la unidad y, especialmente, para establecer las medidas de prevención pertinentes.                                                                                                                                                                             | Sí / No                 |
|                     | 7.3. ¿Celebra el Servicio / Unidad Sesiones Clínicas?                                                                                                                                                                                                |                                                                                                                                                                                                                                                                                                                                                                                                                 | Sí / No                 |
|                     | 7.4. Gestión por procesos                                                                                                                                                                                                                            |                                                                                                                                                                                                                                                                                                                                                                                                                 |                         |
|                     | 7.4.1. ¿El Servicio / Unidad de MI ha elaborado su Mapa de Procesos?                                                                                                                                                                                 |                                                                                                                                                                                                                                                                                                                                                                                                                 | Sí / No                 |
|                     | 7.4.2. ¿Se ha implantado una gestión por procesos, para aquellos procesos más relevantes que atiende la unidad?                                                                                                                                      |                                                                                                                                                                                                                                                                                                                                                                                                                 | Sí / No                 |
|                     | 7.4.3. Nº de procesos elaborados por la unidad                                                                                                                                                                                                       | Se considera que el Servicio/Unidad gestiona de forma sistemática un proceso si cumple con los siguientes requisitos:<br>1. Está definido el proceso, entrada y salida.<br>2. Existe un gestor del proceso<br>3. Se concretan las actuaciones de los diferentes agentes que intervienen en el mismo<br>4. El proceso está diagramado<br>5. Todos los agentes que intervienen en el proceso lo conocen y aplican | Nº de procesos          |
|                     | 7.5. Dispone de un protocolo asistencial multidisciplinar para                                                                                                                                                                                       |                                                                                                                                                                                                                                                                                                                                                                                                                 | Sí / No                 |
|                     | 7.5.1. Plan de asistencia conjunta                                                                                                                                                                                                                   | El modelo de asistencia conjunta, entre atención primaria y la Unidad de Pacientes Pluripatológicos, es denominado plan de asistencia continuada. Unidad de Pacientes Pluripatológicos. Estándares y recomendaciones                                                                                                                                                                                            | Sí / No                 |
|                     | 7.5.2. Insuficiencia cardiaca                                                                                                                                                                                                                        | Elaborado en colaboración -si hay- la unidad/servicio de cardiología                                                                                                                                                                                                                                                                                                                                            | Sí / No                 |

|  |                                                                  | Definiciones y observaciones                                                                                                                                                                                                                                                                                                                                                                                    | Opciones de respuesta |
|--|------------------------------------------------------------------|-----------------------------------------------------------------------------------------------------------------------------------------------------------------------------------------------------------------------------------------------------------------------------------------------------------------------------------------------------------------------------------------------------------------|-----------------------|
|  | 7.5.3. Otras patologías                                          | Elaborado en colaboración -si hay- de otras unidades implicadas en el manejo de la enfermedad                                                                                                                                                                                                                                                                                                                   | Sí / No               |
|  | 7.6. ¿Se realiza un pase de visita (en planta) multidisciplinar? | Requiere el pase de visita conjunta de, al menos, médico y enfermera responsables de las camas de hospitalización convencional                                                                                                                                                                                                                                                                                  | Sí / No               |
|  | 7.7. Se ha implantado un sistema de seguimiento y activación?    | Aplicación de los criterios de atención al paciente agudo ingresado en el hospital de la guía NICE que se cita (monitorización, sistema de alerta, gradación de respuesta)<br>Unidad de Enfermería en Hospitalización Polivalente de Agudos. Estándares y recomendaciones.<br>Acutely ill patients in hospital. Recognition of and response to acute illness in adults in hospital. NICE Clinical Guideline 50. | Sí / No               |
|  | 7.8. ¿Se planifica el alta desde el ingreso del paciente?        | Unidad de Enfermería en Hospitalización Polivalente de Agudos. Estándares y recomendaciones.                                                                                                                                                                                                                                                                                                                    | Sí / No               |
|  |                                                                  |                                                                                                                                                                                                                                                                                                                                                                                                                 |                       |
